# Supplementary material
Source: MDPI journal article supplement (https://www.mdpi.com/2673-8783/2/1/3)
Supplement: s1 [file s1]

## Supplementary Documents

# Kinetic Study of Pd Promoting Effect on Cu/ZnO/Al<sub>2</sub>O<sub>3</sub> Catalyst for Glycerol Hydrogenolysis to Produce 1,2-Propanediol at Low Hydrogen Pressure

Yuanqing Liu, Garry L. Rempel<sup>†</sup> and Flora T. T. Ng<sup>\*</sup>

Department of Chemical Engineering, University of Waterloo, 200 University Ave. W., Waterloo, ON N2L3G1, Canada;  
y289liu@uwaterloo.ca (Y.L.); grempel@uwaterloo.ca (G.L.R.)

<sup>\*</sup> Correspondence: fttng@uwaterloo.ca

<sup>†</sup> Deceased 2 November 2018, this paper is dedicated to the memory of Professor Garry L. Rempel.

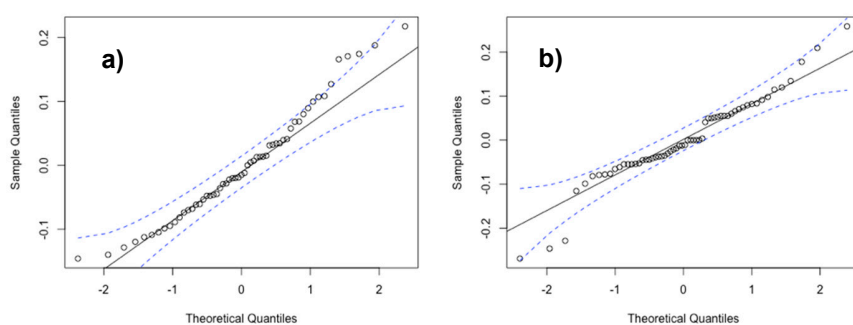

**Figure S1** Normal probability plots of residuals for acetol hydrogenation reactions using two catalysts: a) CZA catalyst; b) 2Pd/CZA catalyst. Dotted curve: 95% confidence interval.

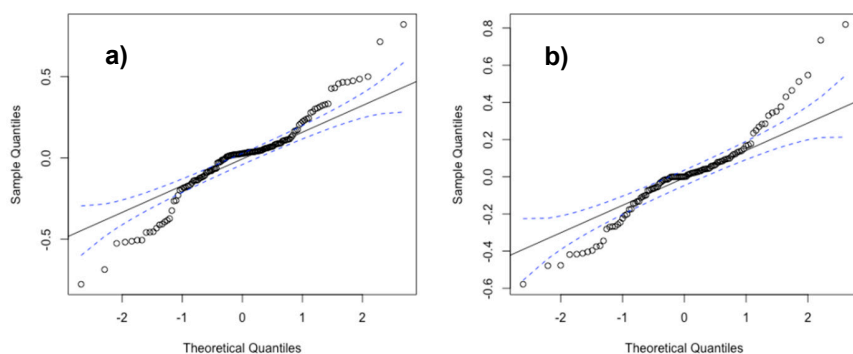

**Figure S2.** Normal probability plots of residuals for glycerol hydrogenolysis reactions using two catalysts: a) CZA catalyst; b) 2Pd/CZA catalyst. Dotted curve: 95% confidence interval.

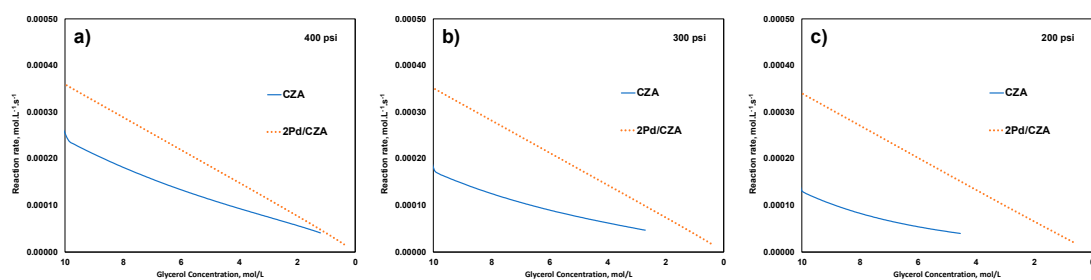

**Figure S3.** Effect of Pd on the glycerol conversion rates over the reaction time at different hydrogen pressures. Other reaction conditions: 200 °C, 500 RPM, 80 wt% aqueous glycerol, 5 wt% catalyst with respect to the weight of glycerol.
